# Supplementary material for: Application of paramagnetic graphene quantum dots as a platform for simultaneous dual-modality bioimaging and tumor-targeted drug delivery
Source: Royal Society of Chemistry journal article supplement (doi:10.1039/c4tb01650e), 2014-11-21
Supplement: c4tb01650e1.pdf [file c4tb01650e1.pdf]

# **Application of Paramagnetic Graphene Quantum Dots as a Platform for Simultaneous Dual-modality Bioimaging and Tumor-targeted Drug Delivery**

Chun-Lin Huang,<sup>a</sup> Chih-Ching Huang,<sup>b</sup> Fu-Der Mai,<sup>c</sup> Chia-Liang Yen,<sup>d</sup> Shin-Hwa  
Tzing,<sup>a</sup> Hsiao-Ting Hsieh,<sup>c</sup> Yong-Chien Ling,<sup>d</sup> and Jia-Yaw Chang<sup>a\*</sup>

- a. Department of Chemical Engineering, National Taiwan University of Science and Technology, 43, Section 4, Keelung Road, Taipei 10607, Taiwan, Republic of China
- b. Institute of Bioscience and Biotechnology and Center for Marine Bioenvironment and Biotechnology, National Taiwan Ocean University, Keelung, Taiwan, Republic of China
- c. Department of Biochemistry, School of Medicine, Taipei Medical University, Taipei, Taiwan, Republic of China
- d. Department of Chemistry, National Tsing Hua University, Hsinchu, Taiwan, Republic of China

E-mail: [jychang@mail.ntust.edu.tw](mailto:jychang@mail.ntust.edu.tw)

Department of Chemical Engineering, National Taiwan University of Science and Technology, 43, Section 4, Keelung Road, Taipei 10607, Taiwan, Republic of China

Tel.: +886-2-27303636

Fax: +886-2-27376644

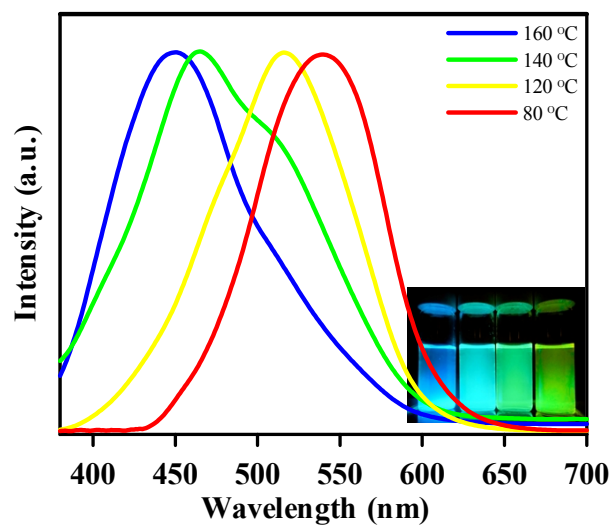

**Figure S1.** PL emission spectra of GQD obtained at different reaction temperature ( $\lambda_{\text{ex}} = 350$  nm). The insets are digital photographs of the GQD prepared at 160 °C, 140 °C, 120 °C, and 80 °C (from left to right), respectively, under illumination of UV light (365 nm).

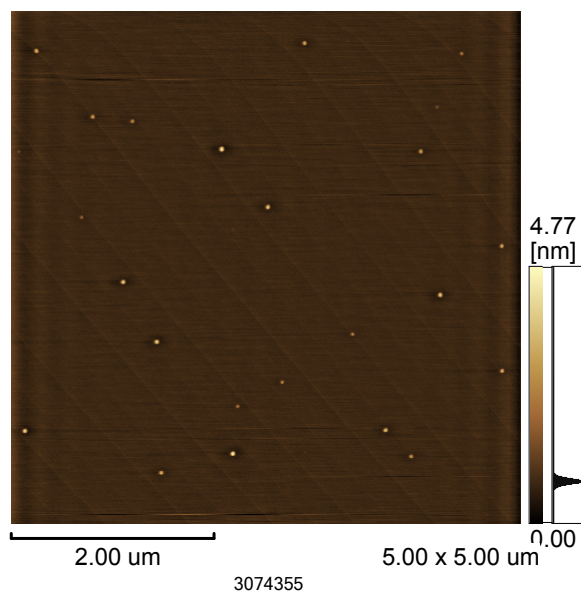

**Figure S2.** AFM images of GQDs deposited on a freshly cleaved mica substrate. The dimensions of the scanned area are  $5 \times 5 \mu\text{m}^2$ .

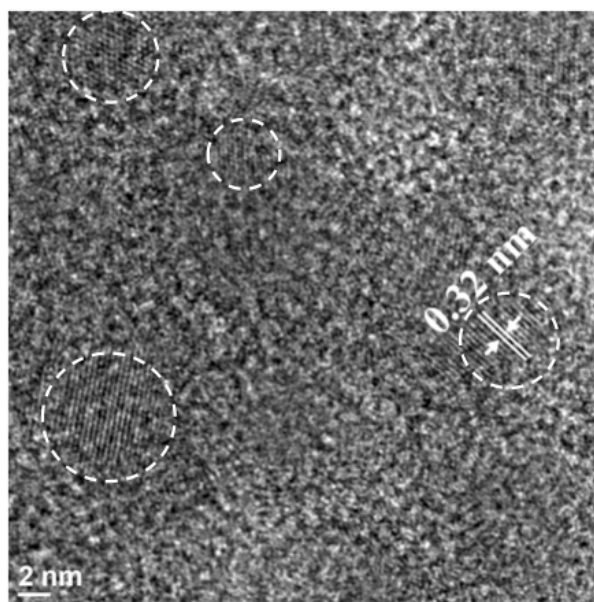

**Figure S3.** High magnification TEM image of the as-prepared GQDs.

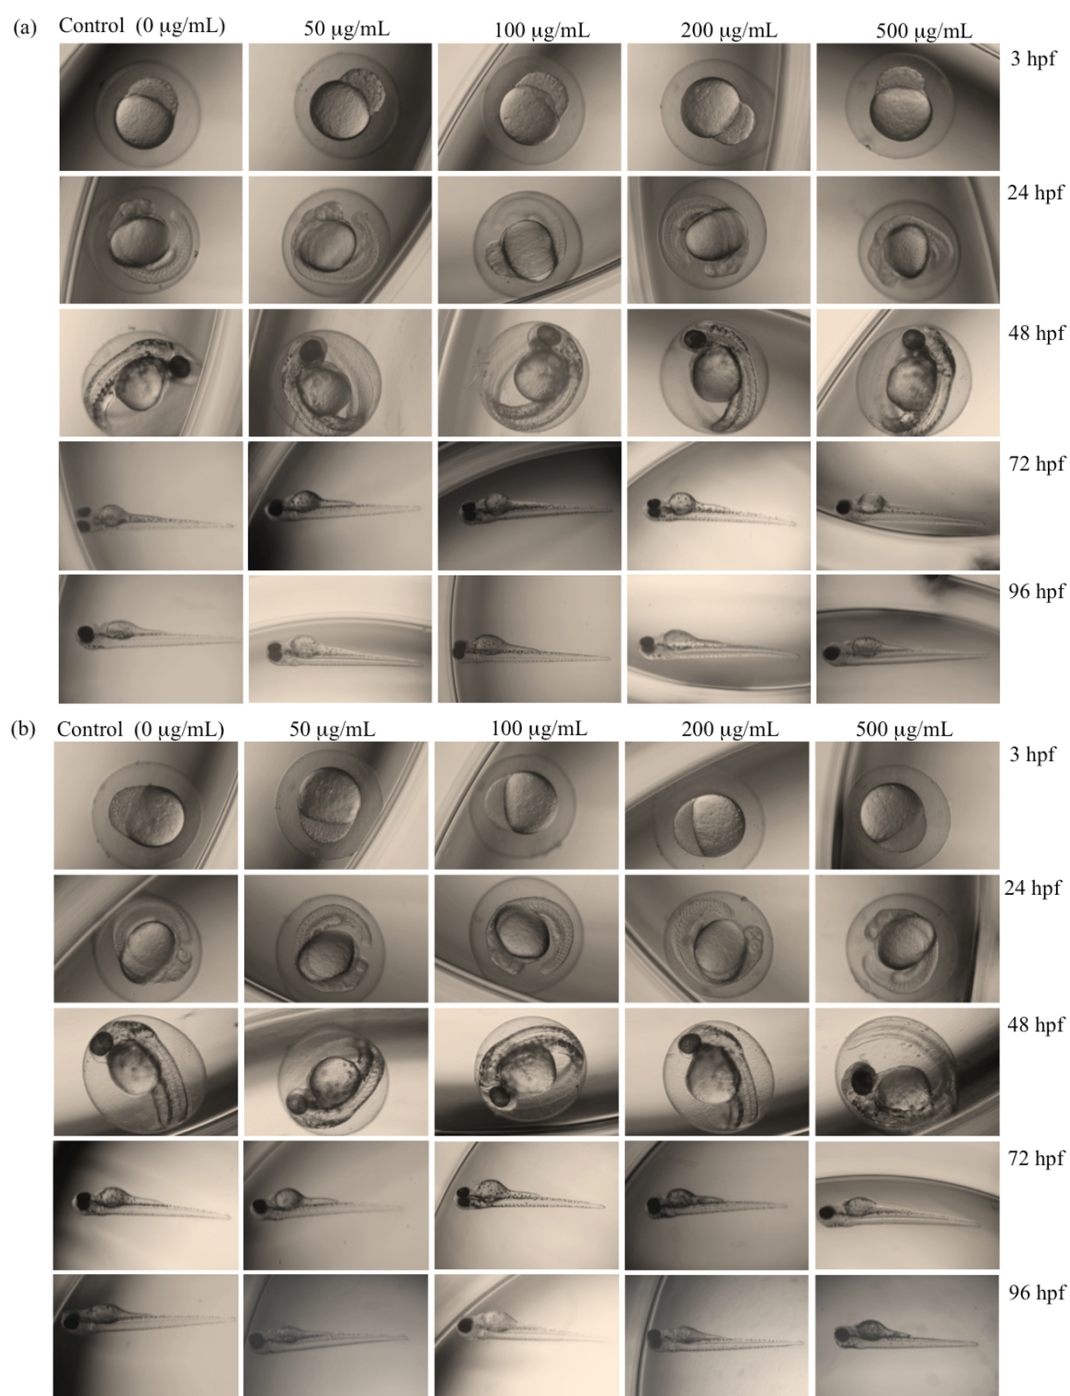

**Figure S4.** Optical microscopic images showing the representative morphological characteristics of zebrafish embryos exposed to different concentrations of (a) GQDs and (b) folate-GdGQDs at different developmental stages.

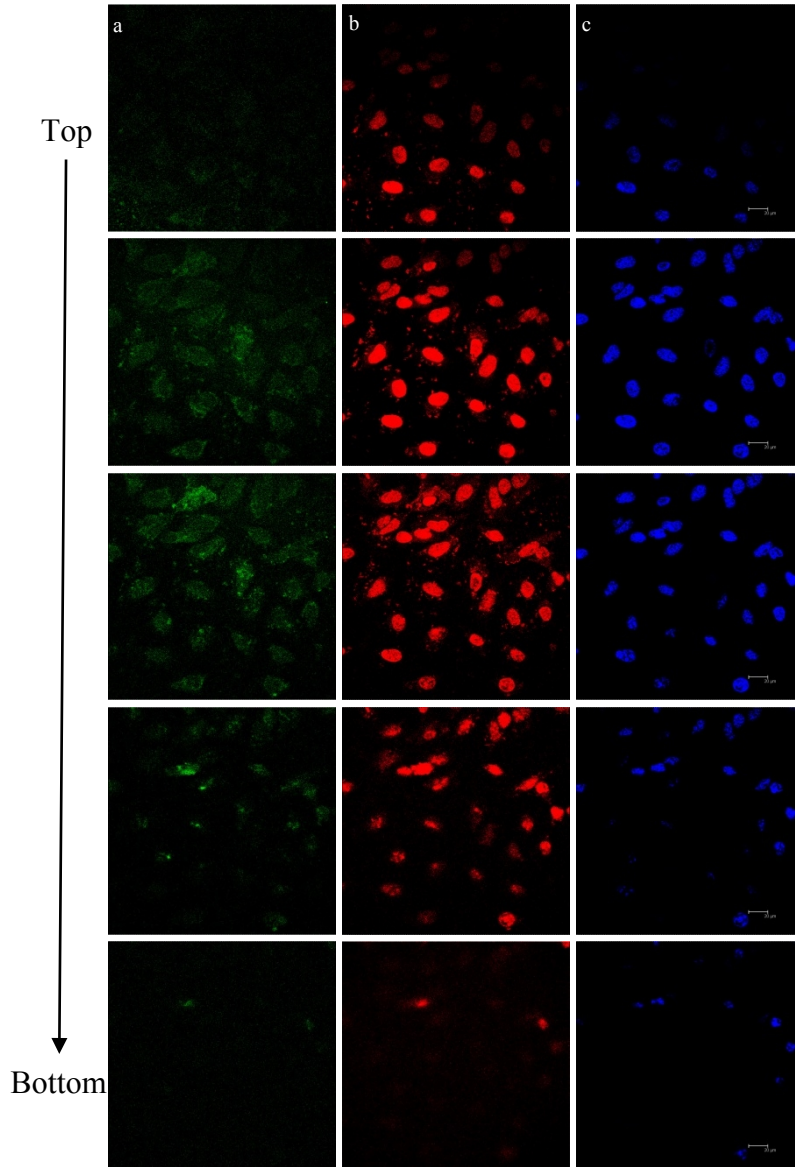

**Figure S5.** Z-stack confocal imaging obtained from HeLa cell incubated with nanocarriers. Images were taken from the top to the bottom of the cell with consecutive Z-axis slices. (a) Green fluorescence originating from nanocarriers; (b) red emission emitting from DOX; and (c) blue emission emitting from DAPI. Scale bars represent 20  $\mu\text{m}$ .
